# Supplementary material for: Exploring the intensity, barriers and correlates of physical activity In Iranian pregnant women: a cross-sectional study
Source: HighWire-hosted journal article supplement (doi:10.1136/bmjsem-2020-001020), 2021-10-01
Supplement: bmjsem-2020-001020supp001_data_supplement.pdf [file bmjsem-2020-001020supp001_data_supplement.pdf]

**Supplementary material 1: Frequent Distribution of Pregnant Women in Health Centers and Bases in Ilam, Iran, during 2018**

| <b>Health centers and bases</b> | <b>Frequency</b> | <b>Percentage</b> |
|---------------------------------|------------------|-------------------|
| Health center number 1          | 74               | 24.66             |
| Health center number 4          | 37               | 12.33             |
| Health center number 5          | 25               | 8.33              |
| Health center number 6          | 21               | 7                 |
| Health center number 8          | 21               | 7                 |
| Health center number 9          | 15               | 5                 |
| Health center number 10         | 5                | 1.6               |
| Health center number 13         | 2                | 0.06              |
| Health base number 1            | 48               | 16                |
| Health base number 3            | 25               | 8.33              |
| Health base number 7            | 27               | 9                 |
| Total                           | 300              | 100               |

**Supplementary material 2. Frequency distribution of women's demographic and obstetrics history characteristics and comparison of the total score of PA intensity in terms of demographic and obstetrics history characteristics (n = 300)**

| Characteristics                                  | Category                 | N (%)       | Mean  | SD    | *P-value  |
|--------------------------------------------------|--------------------------|-------------|-------|-------|-----------|
| Age (years)                                      | ≤ 24                     | 85 (28.32)  | 43.43 | 26.19 | † 0.42    |
|                                                  | 25-29                    | 98 (32.66)  | 47.36 | 27.65 |           |
|                                                  | 30-34                    | 92 (30.66)  | 49.42 | 25.76 |           |
|                                                  | ≥ 35                     | 25 (8.33)   | 50.55 | 22.33 |           |
| Pre- or early pregnancy BMI (kg/m <sup>2</sup> ) | ≤ 18.5                   | 12 (4)      | 35.13 | 16.23 | † < 0.001 |
|                                                  | 18.5-24.9                | 107 (35.66) | 43.77 | 25.41 |           |
|                                                  | 25-29.9                  | 132 (44)    | 45.94 | 23.73 |           |
|                                                  | ≥ 30                     | 49 (16.33)  | 60.71 | 31.91 |           |
| Ethnicity                                        | Fars                     | 11(3.66)    | 71.42 | 24.58 | † 0.003   |
|                                                  | Kurdish                  | 256 (85.33) | 46.44 | 25.48 |           |
|                                                  | Lur                      | 24 (8)      | 38.80 | 28.46 |           |
|                                                  | Lak                      | 9 (3)       | 59.78 | 27.85 |           |
| Level of education                               | Secondary                | 21 (7)      | 33.93 | 20.46 | † 0.01    |
|                                                  | Diploma                  | 98 (32.66)  | 44.30 | 23.54 |           |
|                                                  | University education     | 181 (60.33) | 50.22 | 27.67 |           |
| Occupation                                       | Employed                 | 41 (13.66)  | 49.03 | 25.52 | ‡ 0.62    |
|                                                  | Housewife                | 259 (86.33) | 46.85 | 26.41 |           |
| Income (month's wages: millions Rls)             | Undesirable < 20         | 34 (11.33)  | 44.11 | 29.29 | † 0.02    |
|                                                  | Fairly favourable: 20-40 | 150 (50)    | 43.78 | 23.07 |           |
|                                                  | Optimal: 40-100          | 116 (38.66) | 52.39 | 28.48 |           |
| Number of pregnancy                              | 1                        | 152 (50.66) | 43.49 | 25.52 | † 0.09    |
|                                                  | 2                        | 94 (31.33)  | 50.29 | 28.62 |           |
|                                                  | 3                        | 45 (15)     | 52.62 | 22.80 |           |
|                                                  | 4                        | 9 (3)       | 48.78 | 23.38 |           |
| Number of children                               | 0                        | 153 (51)    | 39.73 | 23.32 | † < 0.001 |
|                                                  | 1                        | 112 (37.33) | 55.18 | 28.13 |           |
|                                                  | 2                        | 35 (11.66)  | 53.84 | 23.26 |           |
| Gestational age                                  | 10-14                    | 67 (22.33)  | 37.55 | 17.44 | † 0.002   |

|                                                 |       |             |       |       |        |
|-------------------------------------------------|-------|-------------|-------|-------|--------|
| (wks)                                           | 15-28 | 123 (41)    | 48.92 | 27.87 |        |
|                                                 | 29-37 | 110 (36.66) | 51.01 | 27.60 |        |
| Participation in childbirth preparation classes | Yes   | 34 (11.33)  | 36.75 | 16.76 | ‡ 0.01 |
|                                                 | No    | 266 (88.66) | 48.48 | 26.97 |        |
| Habit of exercise before pregnancy              | Yes   | 110 (36.66) | 51.11 | 30.40 | ‡ 0.04 |
|                                                 | No    | 190 (63.33) | 44.85 | 23.30 |        |

\*Significance level:  $P < 0.05$

†One-way ANOVA test

‡Independent sample t-test

**Supplementary material 3. Frequency distribution of women's demographic and obstetrics history characteristics and comparison of the total score of PA barriers in terms of demographic and obstetrics history characteristics (n = 300)**

| Characteristics                                  | Category             | N (%)       | Mean  | SD   | *P-value   |
|--------------------------------------------------|----------------------|-------------|-------|------|------------|
| Age (years)                                      | ≤ 24                 | 85 (28.32)  | 30.83 | 6.13 | † P = 0.86 |
|                                                  | 25-29                | 98 (32.66)  | 30.81 | 5.39 |            |
|                                                  | 30-34                | 92 (30.66)  | 30.33 | 6.11 |            |
|                                                  | ≥ 35                 | 25 (8.33)   | 31.36 | 5.36 |            |
| Pre- or early pregnancy BMI (kg/m <sup>2</sup> ) | ≤ 18.5               | 12 (4)      | 31.75 | 3.57 | † P = 0.15 |
|                                                  | 18.5-24.9            | 107 (35.66) | 30.08 | 6.00 |            |
|                                                  | 25-29.9              | 132 (44)    | 30.56 | 5.15 |            |
|                                                  | ≥ 30                 | 49 (16.33)  | 32.26 | 7.18 |            |
| Ethnicity                                        | Fars                 | 11(3.66)    | 29.72 | 4.24 | † P = 0.02 |
|                                                  | Kurdish              | 256 (85.33) | 30.70 | 5.60 |            |
|                                                  | Lur                  | 24 (8)      | 33.04 | 8.19 |            |
|                                                  | Lak                  | 9 (3)       | 26.22 | 2.27 |            |
| Level of education                               | Secondary            | 21 (7)      | 31.09 | 8.25 | † P = 0.92 |
|                                                  | Diploma              | 98 (32.66)  | 30.81 | 6.21 |            |
|                                                  | University education | 181 (60.33) | 30.62 | 5.26 |            |
| Occupation                                       | Employed             | 41 (13.66)  | 31.21 | 4.20 | ‡ P = 0.55 |
|                                                  | Housewife            | 259 (86.33) | 30.64 | 6.03 |            |
| Income (month's)                                 | Undesirable < 20     | 34 (11.33)  | 29.91 | 5.33 | † P = 0.01 |

|                                                        |                          |             |       |      |            |
|--------------------------------------------------------|--------------------------|-------------|-------|------|------------|
| <b>wages: millions Rls)</b>                            |                          |             |       |      |            |
|                                                        | Fairly favourable: 20-40 | 150 (50)    | 31.70 | 5.69 |            |
|                                                        | Optimal: 40-100          | 116 (38.66) | 29.68 | 5.92 |            |
| <b>Number of pregnancy</b>                             | 1                        | 152 (50.66) | 30.85 | 6.12 | † P = 0.01 |
|                                                        | 2                        | 94 (31.33)  | 29.55 | 4.86 |            |
|                                                        | 3                        | 45 (15)     | 31.82 | 6.31 |            |
|                                                        | 4                        | 9 (3)       | 35.11 | 3.95 |            |
| <b>Number of children</b>                              | 0                        | 153 (51)    | 30.83 | 5.93 | † P = 0.71 |
|                                                        | 1                        | 112 (37.33) | 30.40 | 5.66 |            |
|                                                        | 2                        | 35 (11.66)  | 31.22 | 5.83 |            |
| <b>Gestational age (wks)</b>                           | 10-14                    | 67 (22.33)  | 30.88 | 5.52 | † P = 0.92 |
|                                                        | 15-28                    | 123 (41)    | 30.78 | 6.92 |            |
|                                                        | 29-37                    | 110 (36.66) | 30.54 | 4.53 |            |
| <b>Participation in childbirth preparation classes</b> | Yes                      | 34 (11.33)  | 30.61 | 5.22 | ‡ P = 0.91 |
|                                                        | No                       | 266 (88.66) | 30.73 | 5.89 |            |
| <b>Habit of exercise before pregnancy</b>              | Yes                      | 110 (36.66) | 29.81 | 7.03 | ‡ P = 0.04 |
|                                                        | No                       | 190 (63.33) | 31.24 | 4.91 |            |

\*Significance level:  $P < 0.05$

†One-way ANOVA test

‡Independent sample t-test
